# Supplementary material for: Commentary: The Efficacy of Nerve Growth Factor Antibody for the Treatment of Osteoarthritis Pain and Chronic Low-Back Pain: A Meta-analysis
Source: Front Pharmacol. 2021 Apr 20;12:619344. doi: 10.3389/fphar.2021.619344 (PMC8108005; doi:10.3389/fphar.2021.619344)
Supplement: Supplementary file 1 [file table1.xlsx]

## Sheet: Yang 2020
Study	Outcome	Exp_N	Exp_mean	Exp_SD	Cont_N	Cont_mean	Cont_SD
Kivitz 2013	WOMAC Pain	822	-1.97	0.29	230	-1.25	0.16
Spierings 2013	WOMAC Pain	311	-3.58	0.22	141	-2.62	0.24
Balanescu 2014	WOMAC Pain	452	-2.17	0.2	152	-1.68	0.19
Ekman 2014	WOMAC Pain	419	-2.79	0.27	209	-1.81	0.22
Tiseo 2014	WOMAC Pain	160	-3.1	2.24	55	-2.4	2.18
Mayorga 2016	WOMAC Pain	98	-2.91	0.38	48	-3.01	0.38
Study	Population	Intervention	Outcome	Scale	Timepoint	Recalculated	Exp_N	Exp_mean	SE	Exp_SD	Cont_N	Cont_mean	SE	Cont_SD
Kivitz 2013	CLBP	Tanezumab 5mg	LBPI	0 to 10	16 weeks (End treatment)	0	232	-1.58	0.16	2.43705	230	-1.25	0.16	2.42652		4772.21	821	2.41095
Kivitz 2013	CLBP	Tanezumab 10mg			16 weeks (End treatment)	0	295	-2.06	0.14	2.40458
Kivitz 2013	CLBP	Tanezumab 20mg			16 weeks (End treatment)	0	295	-2.18	0.14	2.40458
Kivitz 2013	CLBP	Combined				1	822	-1.97		2.41	230	-1.25		2.43
Spierings 2013	OA Hip/Knee	Tanezumab 5mg	WOMAC Pain	0 to 10	8 weeks (End treatment 1)	0	161	-3.58	0.22	2.79149	141	-2.62	0.24	2.84984		2429.1	310	2.79925
Spierings 2013	OA Hip/Knee	Tanezumab 10mg			8 weeks (End treatment 1)	0	150	-3.58	0.23	2.81691
Spierings 2013	OA Hip/Knee	Combined				1	311	-3.58		2.8	141	-2.62		2.85
Balanescu 2014	OA Hip/Knee	Tanezumab 2.5mg	WOMAC Pain	0 to 10	16 weeks (End treatment)	0	157	-2.09	0.18	2.25539	152	-1.68	0.19	2.34248		2355.07	451	2.28514
Balanescu 2014	OA Hip/Knee	Tanezumab 5mg			16 weeks (End treatment)	0	150	-2.19	0.19	2.32702
Balanescu 2014	OA Hip/Knee	Tanezumab 10mg			16 weeks (End treatment)	0	145	-2.25	0.19	2.2879
Balanescu 2014	OA Hip/Knee	Combined				1	452	-2.17		2.29	152	-1.68		2.34
Ekman 2014	OA Hip/Knee	Tanezumab 5mg	WOMAC Pain	0 to 10	16 weeks (End treatment)	0	211	-2.95	0.22	3.19568	209	-1.81	0.22	3.1805		4239.92	418	3.18486
Ekman 2014	OA Hip/Knee	Tanezumab 10mg			16 weeks (End treatment)	0	208	-2.62	0.22	3.17289
Ekman 2014	OA Hip/Knee	Combined				1	419	-2.79		3.18	209	-1.81		3.18
Tiseo 2014	OA Knee	Fasinumab 0.03mg/kg	WOMAC Pain	0 to 10	16 weeks (End treatment)	0	53	-2.7		1.89	55	-2.4		2.18		790.409	159	2.2296
Tiseo 2014	OA Knee	Fasinumab 0.1mg/kg			16 weeks (End treatment)	0	53	-3.4		2.53
Tiseo 2014	OA Knee	Fasinumab 0.3mg/kg			16 weeks (End treatment)	0	54	-3.2		2.24
Tiseo 2014	OA Knee	Combined				1	160	-3.1		2.23	55	-2.4		2.18
Mayorga 2016	OA Knee	Fulranumab 3mg	WOMAC Pain	0 to 10	16 weeks (End treatment)	0	48	-2.78	0.36	2.49415	48	-3.01	0.38	2.63272		611.428	97	2.51065
Mayorga 2016	OA Knee	Fulranumab 9mg				0	50	-3.03	0.36	2.54558
Mayorga 2016	OA Knee	Combined				1	98	-2.91		2.51	48	-3.01		2.63
		Inconsistency in outcome choice. It appears Yang 2020 selects the primary outcome from each included study, rather than a potential consistent timepoint.
		Ekman 2014 includes data from Study 1018, but not Study 1015?
